# Supplementary material for: Characterization of the cytolethal distending toxin (typhoid toxin) in non-typhoidal Salmonella serovars
Source: PubMed Central journal article supplement (PMC4511993; doi:10.1186/s13099-015-0065-1), 2015-07-24
Supplement: 13099_2015_65_MOESM1_ESM.pdf [file 13099_2015_65_MOESM1_ESM.pdf]

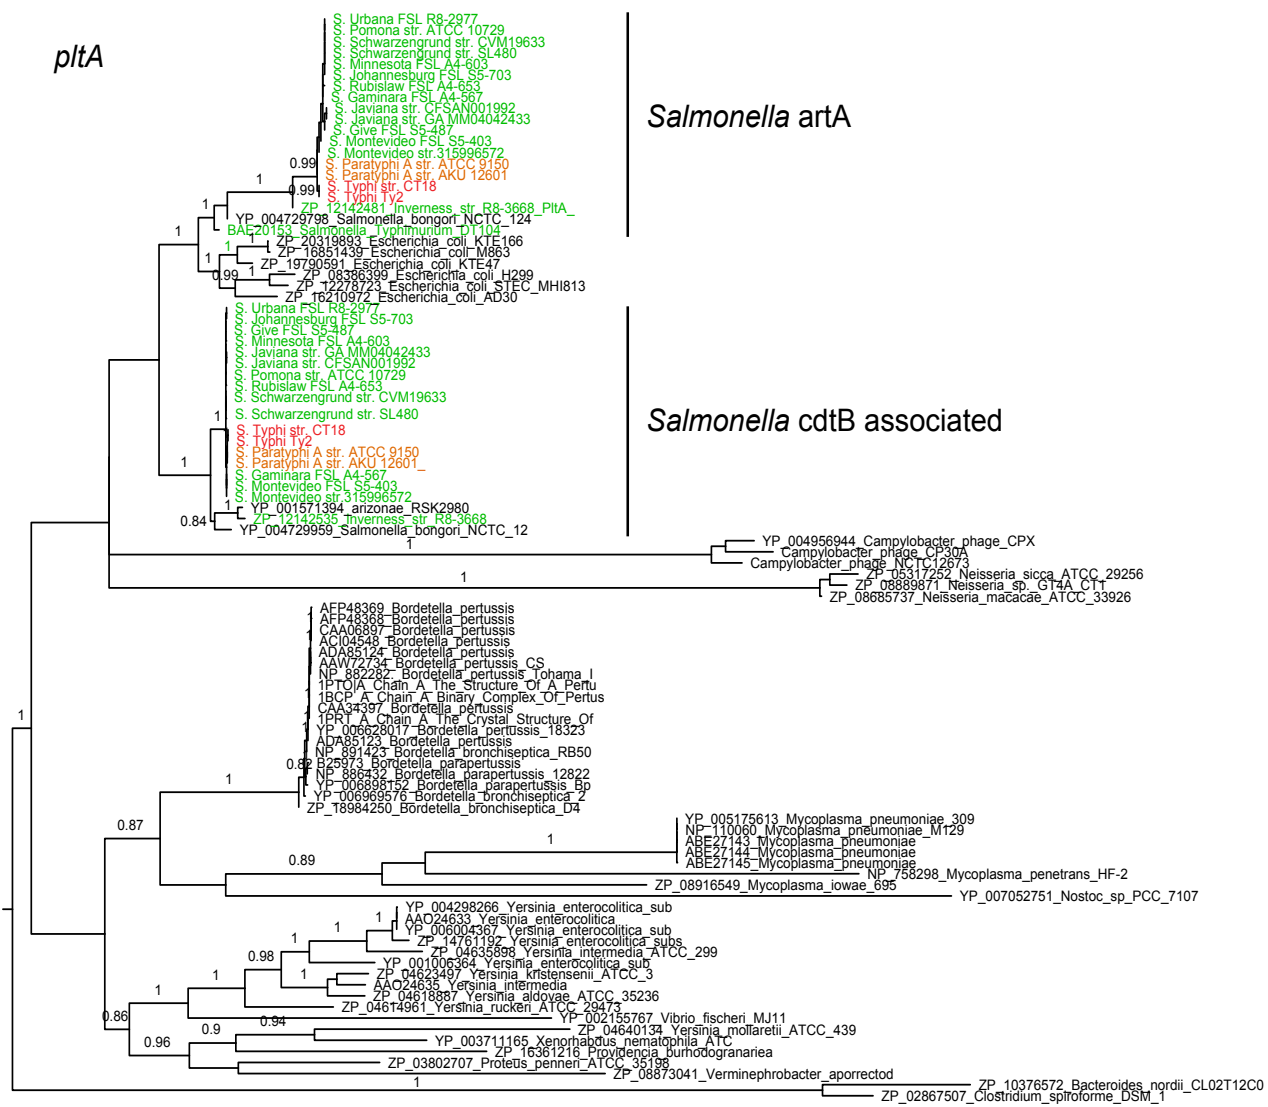

2.0 Amino acid substitutions/site
