# Supplementary material for: Characterization of the cytolethal distending toxin (typhoid toxin) in non-typhoidal Salmonella serovars
Source: PubMed Central journal article supplement (PMC4511993; doi:10.1186/s13099-015-0065-1), 2015-07-24
Supplement: 13099_2015_65_MOESM4_ESM.pdf [file 13099_2015_65_MOESM4_ESM.pdf]

# A

Parent TTATTGACGTTAGACTATGTATCTTACTATCTGCACAAGACATAGAACCAGAAAACAAGTCAGGCATTGCCA  
 Mutant TTATTGACGTTAGACTATGTATCTTACTATCTGCACAAGACATAGAACCAGAAAACAAGT**CAGGCATTGCCA**

Parent GAATAAAATCAACGTCATGAAACA**ATG**AAAAAACCTGTTTTTTTCTTCTGACCATGATCATCTGCAGCTA  
 Mutant **GAATAAAATCAACGTCATGAAACA**GTGTAGGCTGGAGCTGCTTCGAAGTTCCTATACTTTCTAGAGAATAG

Parent TATTTCTTTTGCCTGCGCTAATATCAGTGACTACAAAGTTATGACCTGGAATCTTCAGGGCTCTTCAGCAT  
 Mutant **GAACTTCGGAATAGGAA**-----

Parent CTACAGAAAGTAAATGGAATGTCAATGTCAGACAGCTTTTAAGTGGTACTGCCGGTGTGGATATTCTTA  
 Mutant -----

Parent TGGTACAGGAGGCCGGTGTCTGTTCCACCTCAGCGGTTCTACCGGACGACATATTCAGCCTTTTGGAGT  
 Mutant -----

Parent GGGTATTCCCATTGATGAATACACCTGGAATCTCGGAACCACCAGCCGTCAGGATATAAGATATATCTAC  
 Mutant -----

Parent CACTCGGCTATTGATGTTGGAGCACGCCGTGTTAATCTGGCAATAGTTTTCCAGACAAAGAGCGGATAATG  
 Mutant -----

Parent TTTATGTCTTGCCTCCGACAACCTGTCGCATCTCGCCCCGTCATTGGCATCGGACTGGGTAATGATGTTTTTC  
 Mutant -----

Parent TGACAGCGCACGCACTGGCTAGTGGAGGTCCGGATGCTGCAGCTATTGTCAGGGTTACCATTAATTTTTT  
 Mutant -----

Parent TAGACAACCTCAGATGCGGCATTTATCCTGGTTTTCTTGCCGGGGATTTTAATCGCAGCCCAGACAGACTTG  
 Mutant -----

Parent AAAATGACCTGATGACTGAGCATCTGGAACGAGTTGTAGCCGTA CTGCACCTACAGAACCCACGCAAATT  
 Mutant -----

Parent GGCGGTGGTATTTTAGATTATGGGGTCATTGTCGATCGAGCACCTTATTCACAAAGGGTTGAAGCTCGCTT  
 Mutant -----

Parent CTGATCATTATCCCGTAGCCTTTTTGGCACGAAGCTGT**TAA**TGAGTAAATAGCGTTGACGACATGTACTTTG  
 Mutant -----**CTAAGGAGGATATTCATATGGACCT**TGAGTAAATAGCGTTGACGACATGTACTTTG

Parent **AGCGTAAGGTGCAGA**ATATATATTTATTATAAGGTA AAAATTATGAGTTGTTTTACCAGTCCAGCAATTAT  
 Mutant **AGCGTAAGGTGCAGA**ATATATATTTATTATAAGGTA AAAATTATGAGTTGTTTTACCAGTCCAGCAATTAT

# B

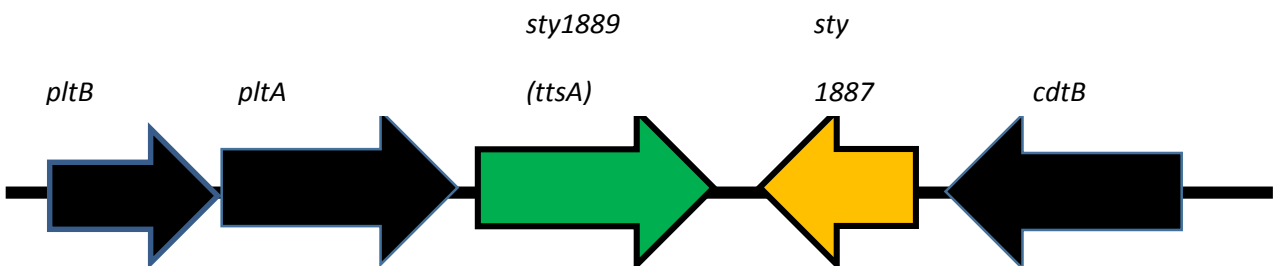

C

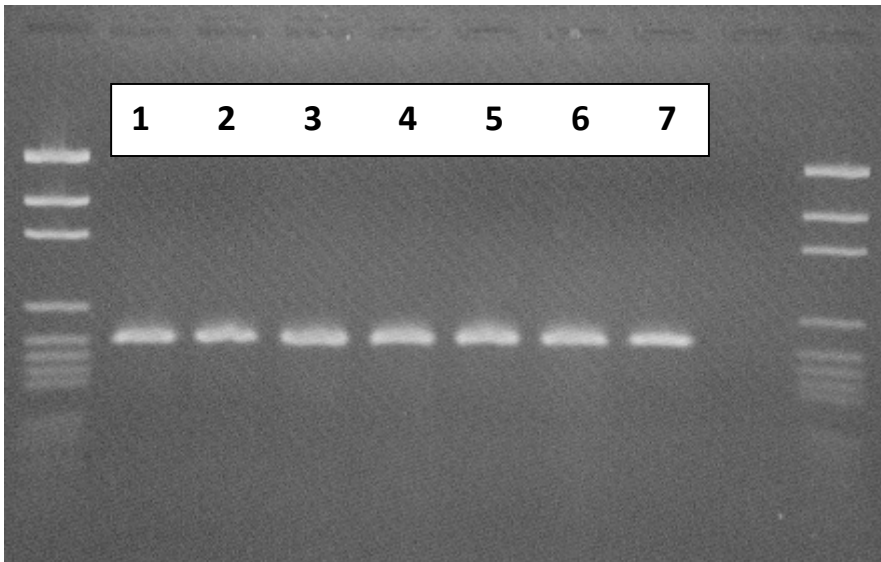

**Additional File 4.** (A) Sequence of *cdtB* and surrounding region, indicating that deletion is internal to *cdtB*; *cdtB* start and stop codons are boxed. Primer sequences in bold. Primer sequence homologous to pKD4 template primer P1 and P2 are italicized. 'Scar' sequence from pKD4 in orange. The sequence shown is for the serovar Javiana mutant; the serovar Schwarzengrund and Montevideo mutants showed equivalent sequences. (B) Organization of the region that contains *pltB*, *pltA*, and *cdtB*, which indicates that the *cdtB* deletion shown in (a) will not disrupt *pltA* or *pltB*. (C) Gel that shows the PCR product for the *cdtB* deletion alleles in serovars Schwarzengrund (lane 1), Montevideo (lane 4), and Javiana (lane 7); these PCR products were used to generate the sequencing data shown in part (A).
